# Supplementary material
Source: MDPI journal article supplement (https://www.mdpi.com/2077-0472/14/4/556)
Supplement: s1 [file s1]

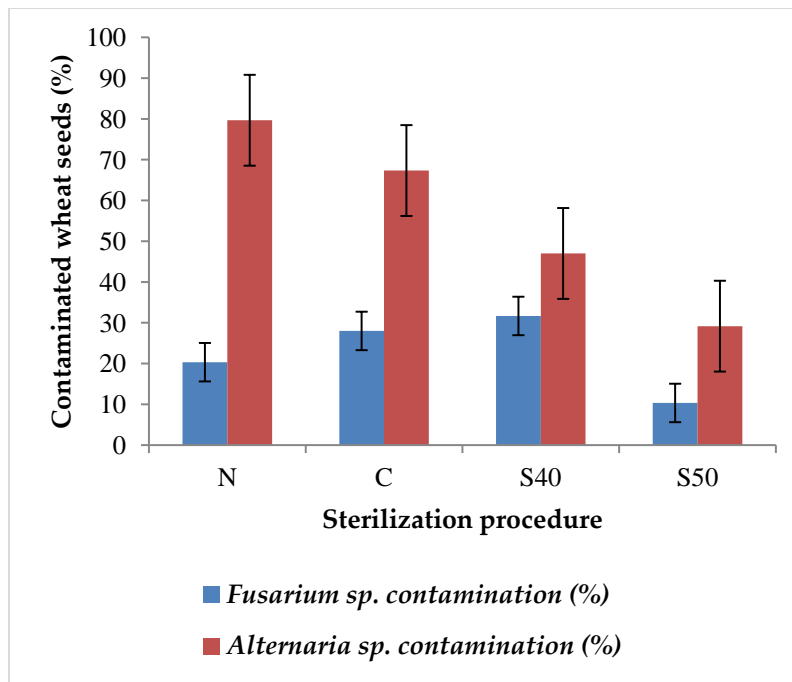

**Supplementary Figure S1:** Wheat (*Triticum aestivum*) seeds of the variety Mara (%) contaminated with the pathogenic fungi of the genus *Alternaria* and *Fusarium* after sterilization procedures.

**Supplementary Table S1:** Odds Ratio Estimates and Wald Confidence Intervals for *Alternaria* contamination of wheat (*Triticum aestivum*) seeds

| Odds Ratio                                  | Estimate | 95% Confidence Limits |         |
|---------------------------------------------|----------|-----------------------|---------|
| sterilization procedure K vs N at PPM=0     | 0.580    | 0.149                 | 2.264   |
| sterilization procedure K vs S40 at PPM=0   | 2.043    | 0.582                 | 7.173   |
| sterilization procedure K vs S50 at PPM=0   | 1.238    | 0.366                 | 4.187   |
| sterilization procedure N vs S40 at PPM=0   | 3.520    | 0.941                 | 13.174  |
| sterilization procedure N vs S50 at PPM=0   | 2.133    | 0.591                 | 7.703   |
| sterilization procedure S40 vs S50 at PPM=0 | 0.606    | 0.188                 | 1.957   |
| sterilization procedure K vs N at PPM=2     | 0.765    | 0.182                 | 3.210   |
| sterilization procedure K vs S40 at PPM=2   | 1.733    | 0.443                 | 6.789   |
| sterilization procedure K vs S50 at PPM=2   | 15.600   | 3.152                 | 77.212  |
| sterilization procedure N vs S40 at PPM=2   | 2.267    | 0.594                 | 8.653   |
| sterilization procedure N vs S50 at PPM=2   | 20.400   | 4.213                 | 98.783  |
| sterilization procedure S40 vs S50 at PPM=2 | 9.000    | 1.979                 | 40.931  |
| sterilization procedure K vs N at PPM=4     | 0.389    | 0.082                 | 1.836   |
| sterilization procedure K vs S40 at PPM=4   | 3.500    | 0.945                 | 12.966  |
| sterilization procedure K vs S50 at PPM=4   | 21.000   | 3.664                 | 120.372 |
| sterilization procedure N vs S40 at PPM=4   | 9.000    | 1.979                 | 40.931  |
| sterilization procedure N vs S50 at PPM=4   | 54.000   | 8.038                 | 362.751 |
| sterilization procedure S40 vs S50 at PPM=4 | 6.000    | 1.082                 | 33.274  |

\*(Because a difference of 0 in the log-odds of the outcome when exponentiated translates to an odds ratio of 1, we test odds ratios for significance against 1 rather than 0). Thus, confidence intervals containing 1 denote non-significant effects. In the table above, we see that the effect of the sterilization procedure is significant when both 2 ml L<sup>-1</sup> PPM or 4 ml L<sup>-1</sup> PPM are added to the growth medium, so the S50 sterilization procedure increases the probability of reducing *Alternarium* contamination at both dosages of PPM.

**Supplementary Table S2:** Effect of surface sterilization procedure and PPM addition to the seed growth medium on the probability of germination of wheat (*Triticum aestivum*) seeds as revealed by logistic regression analysis.

| <b>Sterilization treatment</b> | <b>Wald Chi-square</b> | <b>Pr&gt;Chi-square</b> |
|--------------------------------|------------------------|-------------------------|
| sterilization procedure        | 0,5523                 | 0,9073 <sup>ns</sup>    |
| PPM                            | 0,0090                 | 0,9955 <sup>ns</sup>    |
| sterilization procedure x PPM  | 5,5513                 | 0,4753 <sup>ns</sup>    |

ns indicate non-significant
